# Supplementary material
Source: ML conference proceedings conference paper supplement (https://openaccess.thecvf.com/content/ICCV_2017/html/Shaheen_Constrained_Convolutional_Sparse_ICCV_2017_paper.html)
Supplement: Supplementary file 1 [file Shaheen_Constrained_Convolutional_Sparse_ICCV_2017_supplemental.pdf]

Archive with 1 entries (1 files):
- SupplementaryVideo.mp4
